# Supplementary material for: Phosphatidylinositol 3-kinase and COPII generate LC3 lipidation vesicles from the ER-Golgi intermediate compartment
Source: eLife journal article supplement (doi:10.7554/elife.04135), 2014-11-28
Supplement: supp [file elife-04135-supp-v1.zip]

**A**

| siRNA      | Control |   |   |   |  | Sec23A |   |   |   |
|------------|---------|---|---|---|--|--------|---|---|---|
| Baf A1     | -       | - | + | + |  | -      | - | + | + |
| Starvation | -       | + | - | + |  | -      | + | - | + |

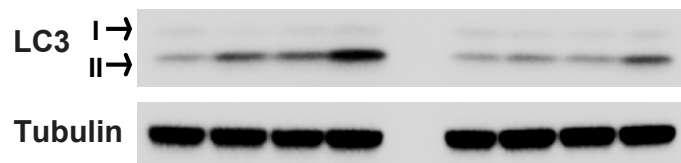**B**

| siRNA      | Control |   |   |   |  | Sec23A |   |   |   |
|------------|---------|---|---|---|--|--------|---|---|---|
| Baf A1     | -       | - | + | + |  | -      | - | + | + |
| Starvation | -       | + | - | + |  | -      | + | - | + |

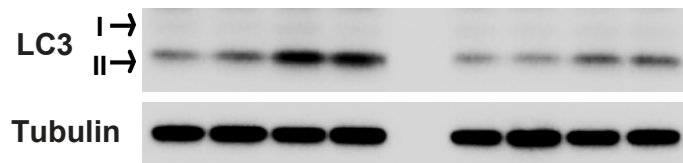**C**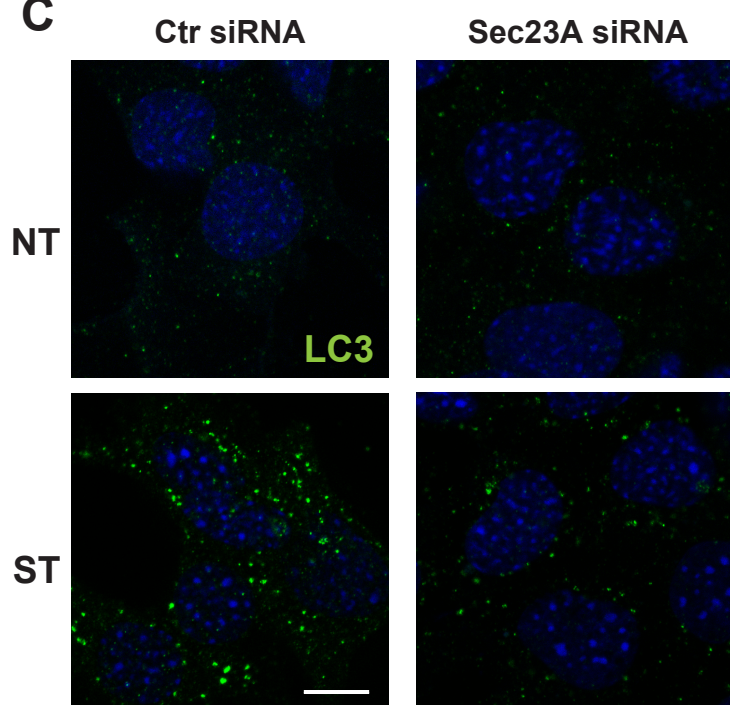**D**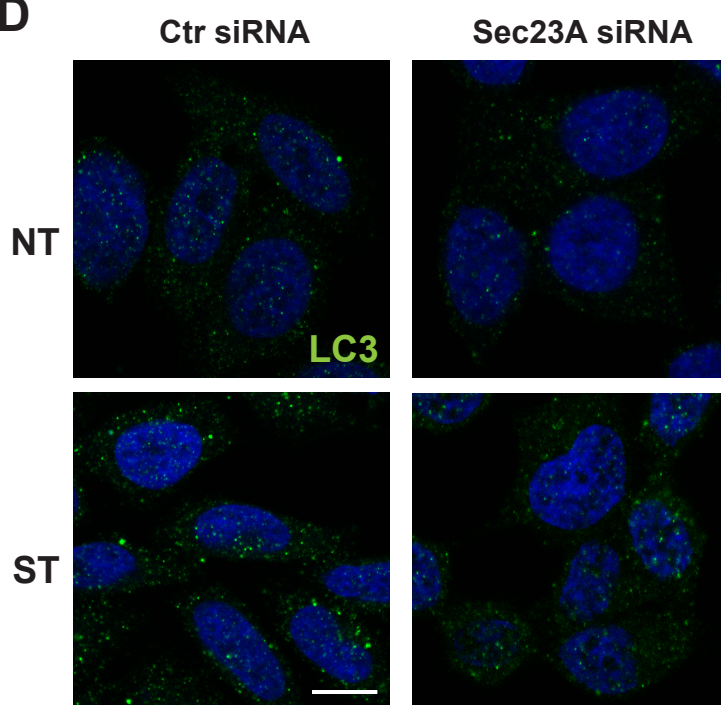**E**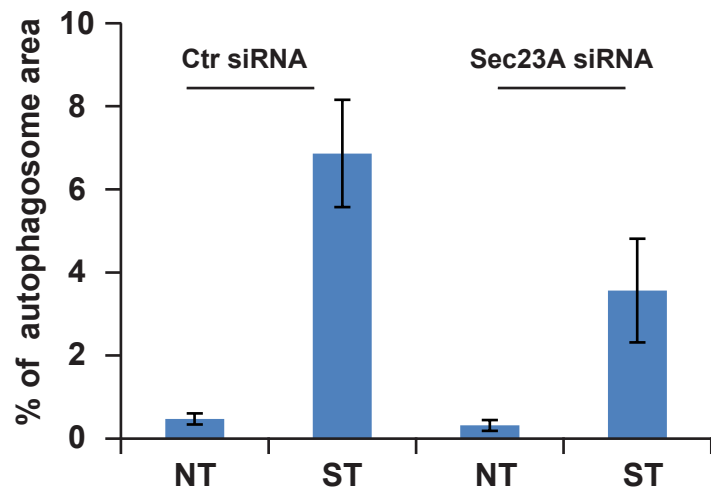**F**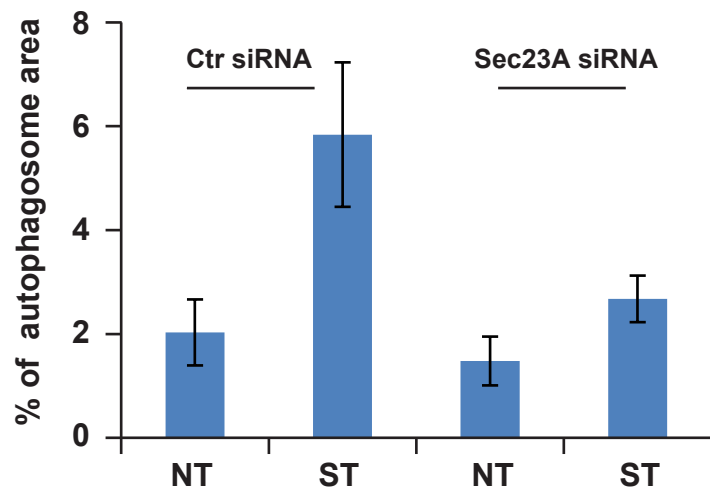

Figure 2-Figure supplement 7
