# Supplementary figures and images for: Phosphatidylinositol 3-kinase and COPII generate LC3 lipidation vesicles from the ER-Golgi intermediate compartment
Source: eLife journal article supplement (doi:10.7554/elife.04135), 2014-11-28

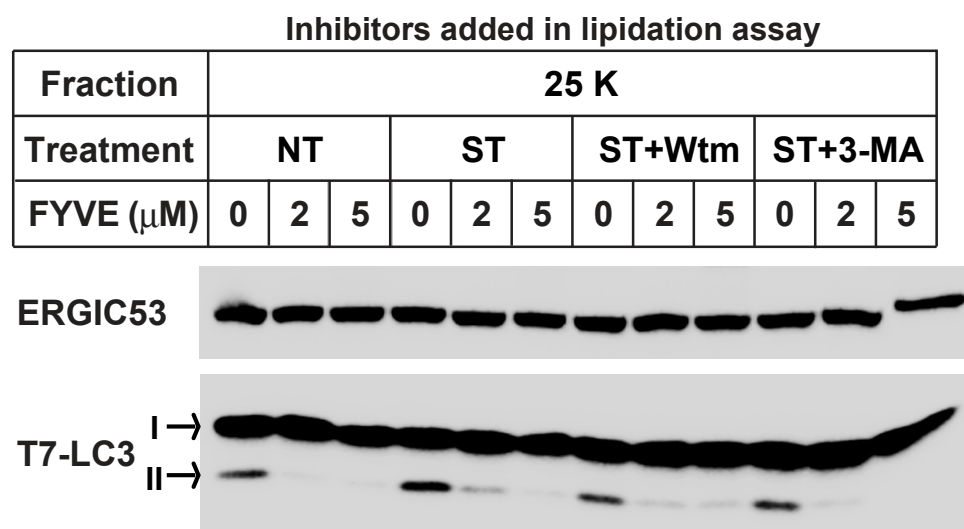

**Figure 1-Figure supplement 1**

Supplement: supp [file elife-04135-supp-v1.zip]

|                 | T | Supernatant |   |   |
|-----------------|---|-------------|---|---|
| SEC22B antibody | - | -           | + | + |
| SEC22B peptide  | - | -           | + | - |
| ProA Sepharose  | - | +           | + | + |

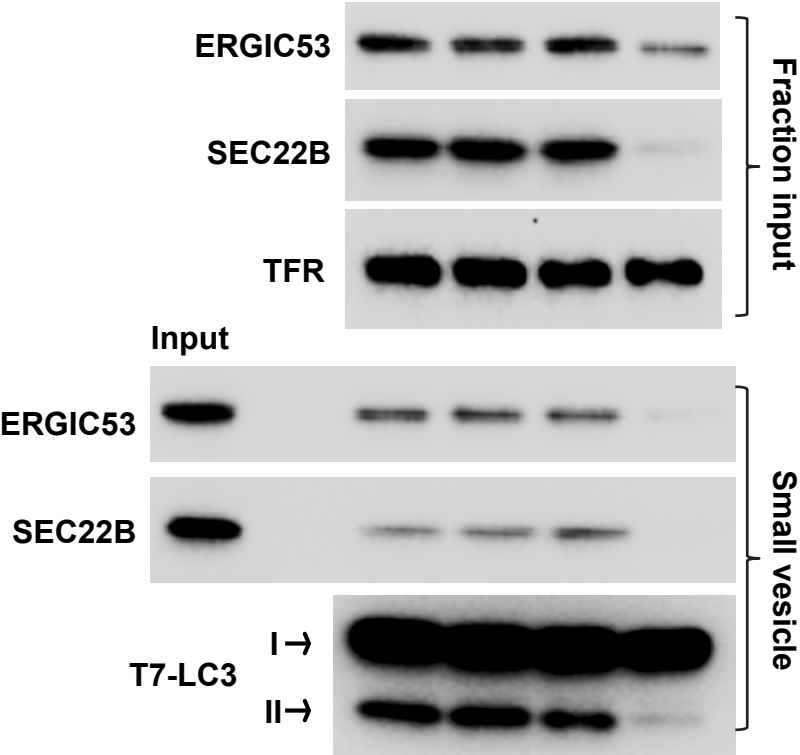

Figure 2-Figure supplement 4

Supplement: supp [file elife-04135-supp-v1.zip]

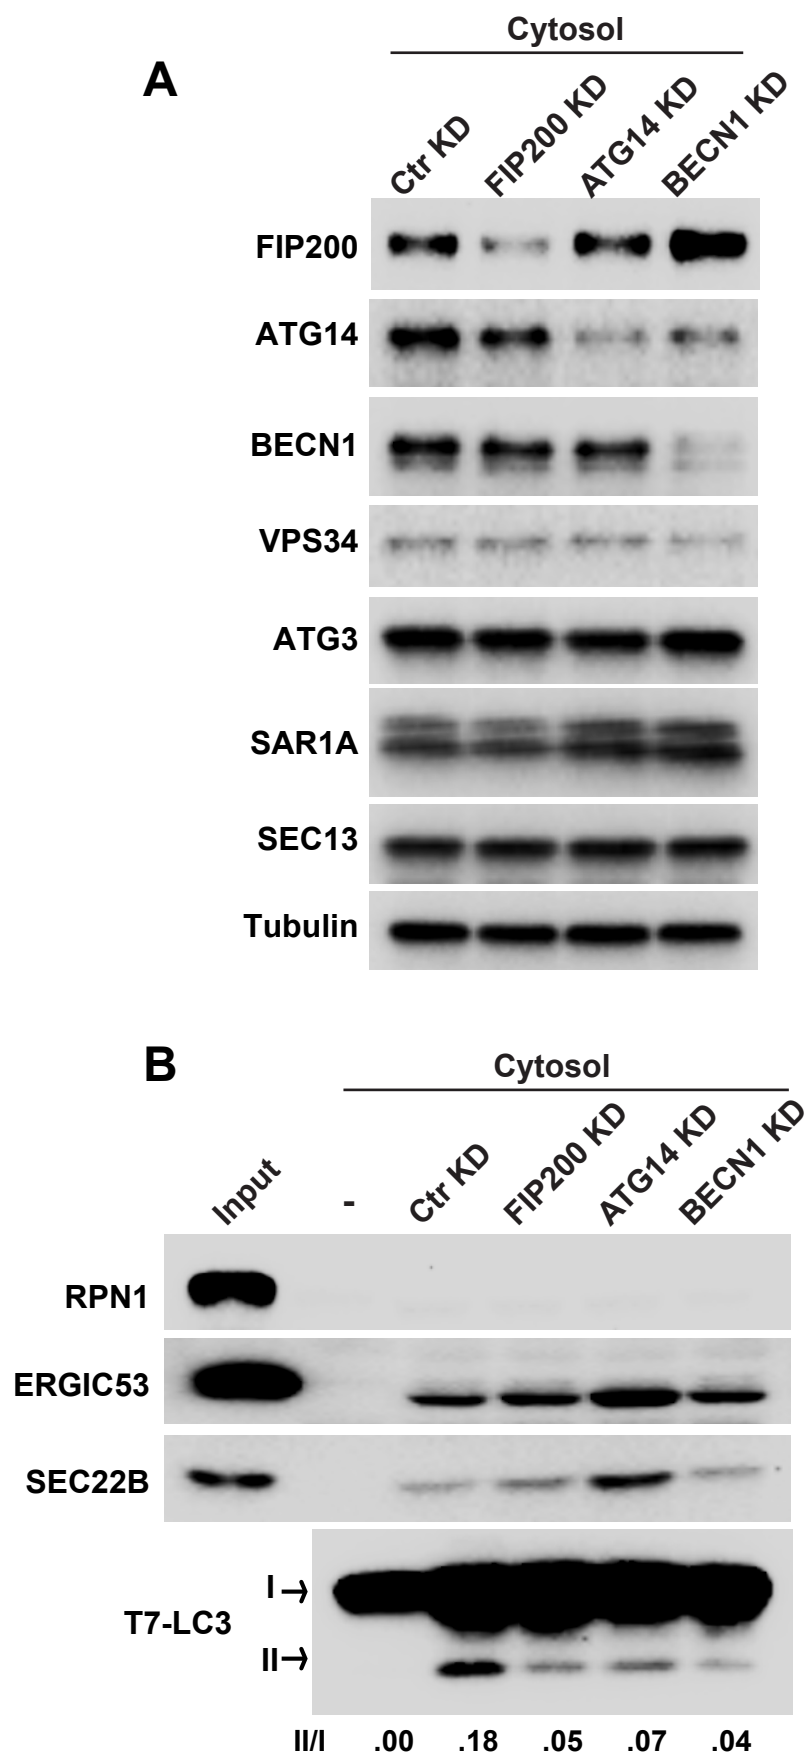

Figure 2-Figure supplement 3

Supplement: supp [file elife-04135-supp-v1.zip]

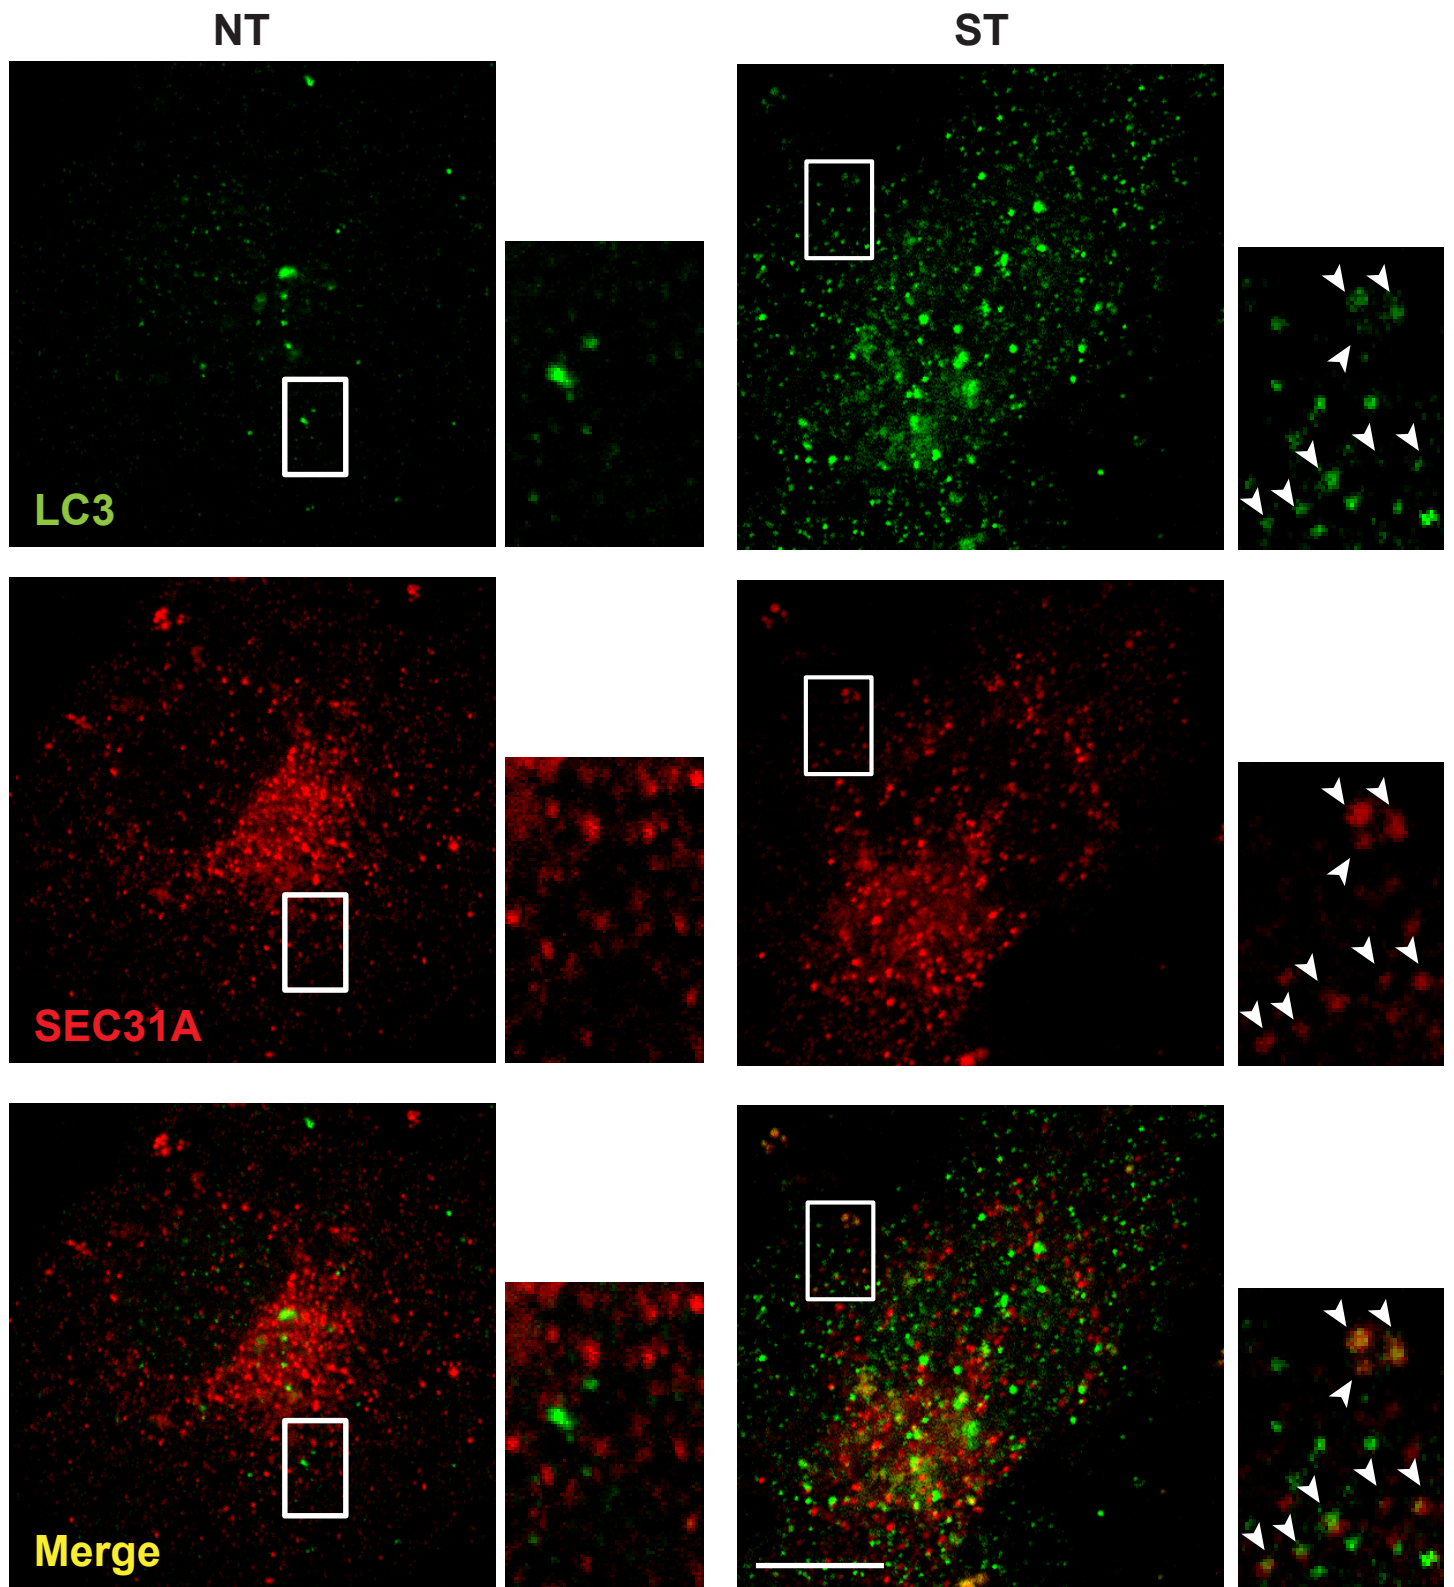

Figure 2-Figure supplement 8

Supplement: supp [file elife-04135-supp-v1.zip]

| Inhibitors | 20KP mem input |  |   |   |   |   |   | 3-MA | H79G |
|------------|----------------|--|---|---|---|---|---|------|------|
| ATPR&GTP   |                |  | - | + | + | - | + | +    | +    |
| 20KP mem   |                |  | - | - | + | + | + | +    | +    |
| Cytosol    |                |  | - | + | - | + | + | +    | +    |

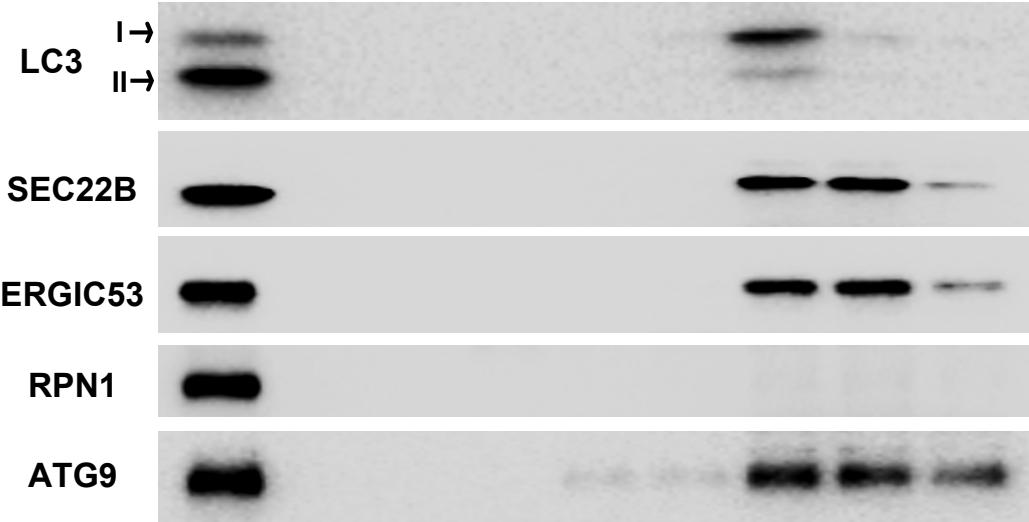

Figure 2-Figure supplement 6

Supplement: supp [file elife-04135-supp-v1.zip]

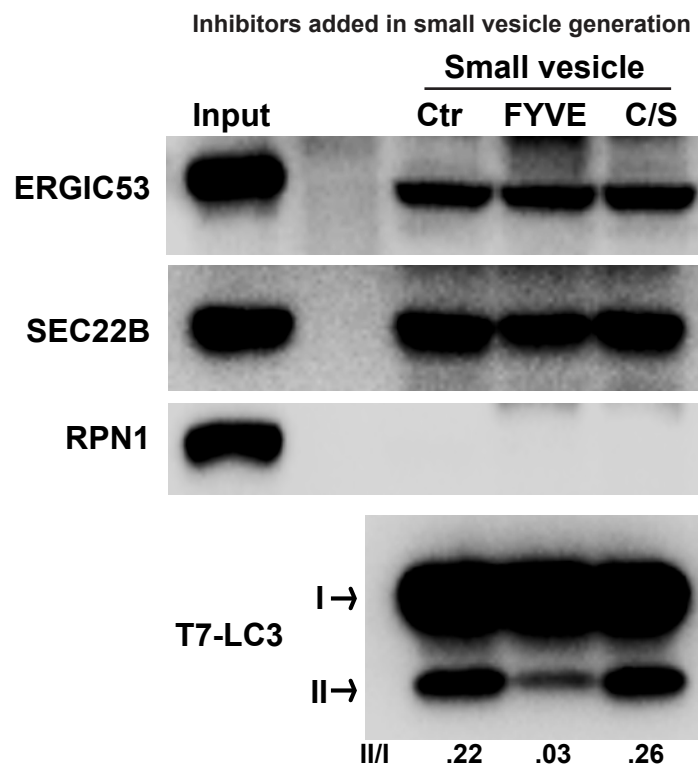

Figure 2-Figure supplement 1

Supplement: supp [file elife-04135-supp-v1.zip]

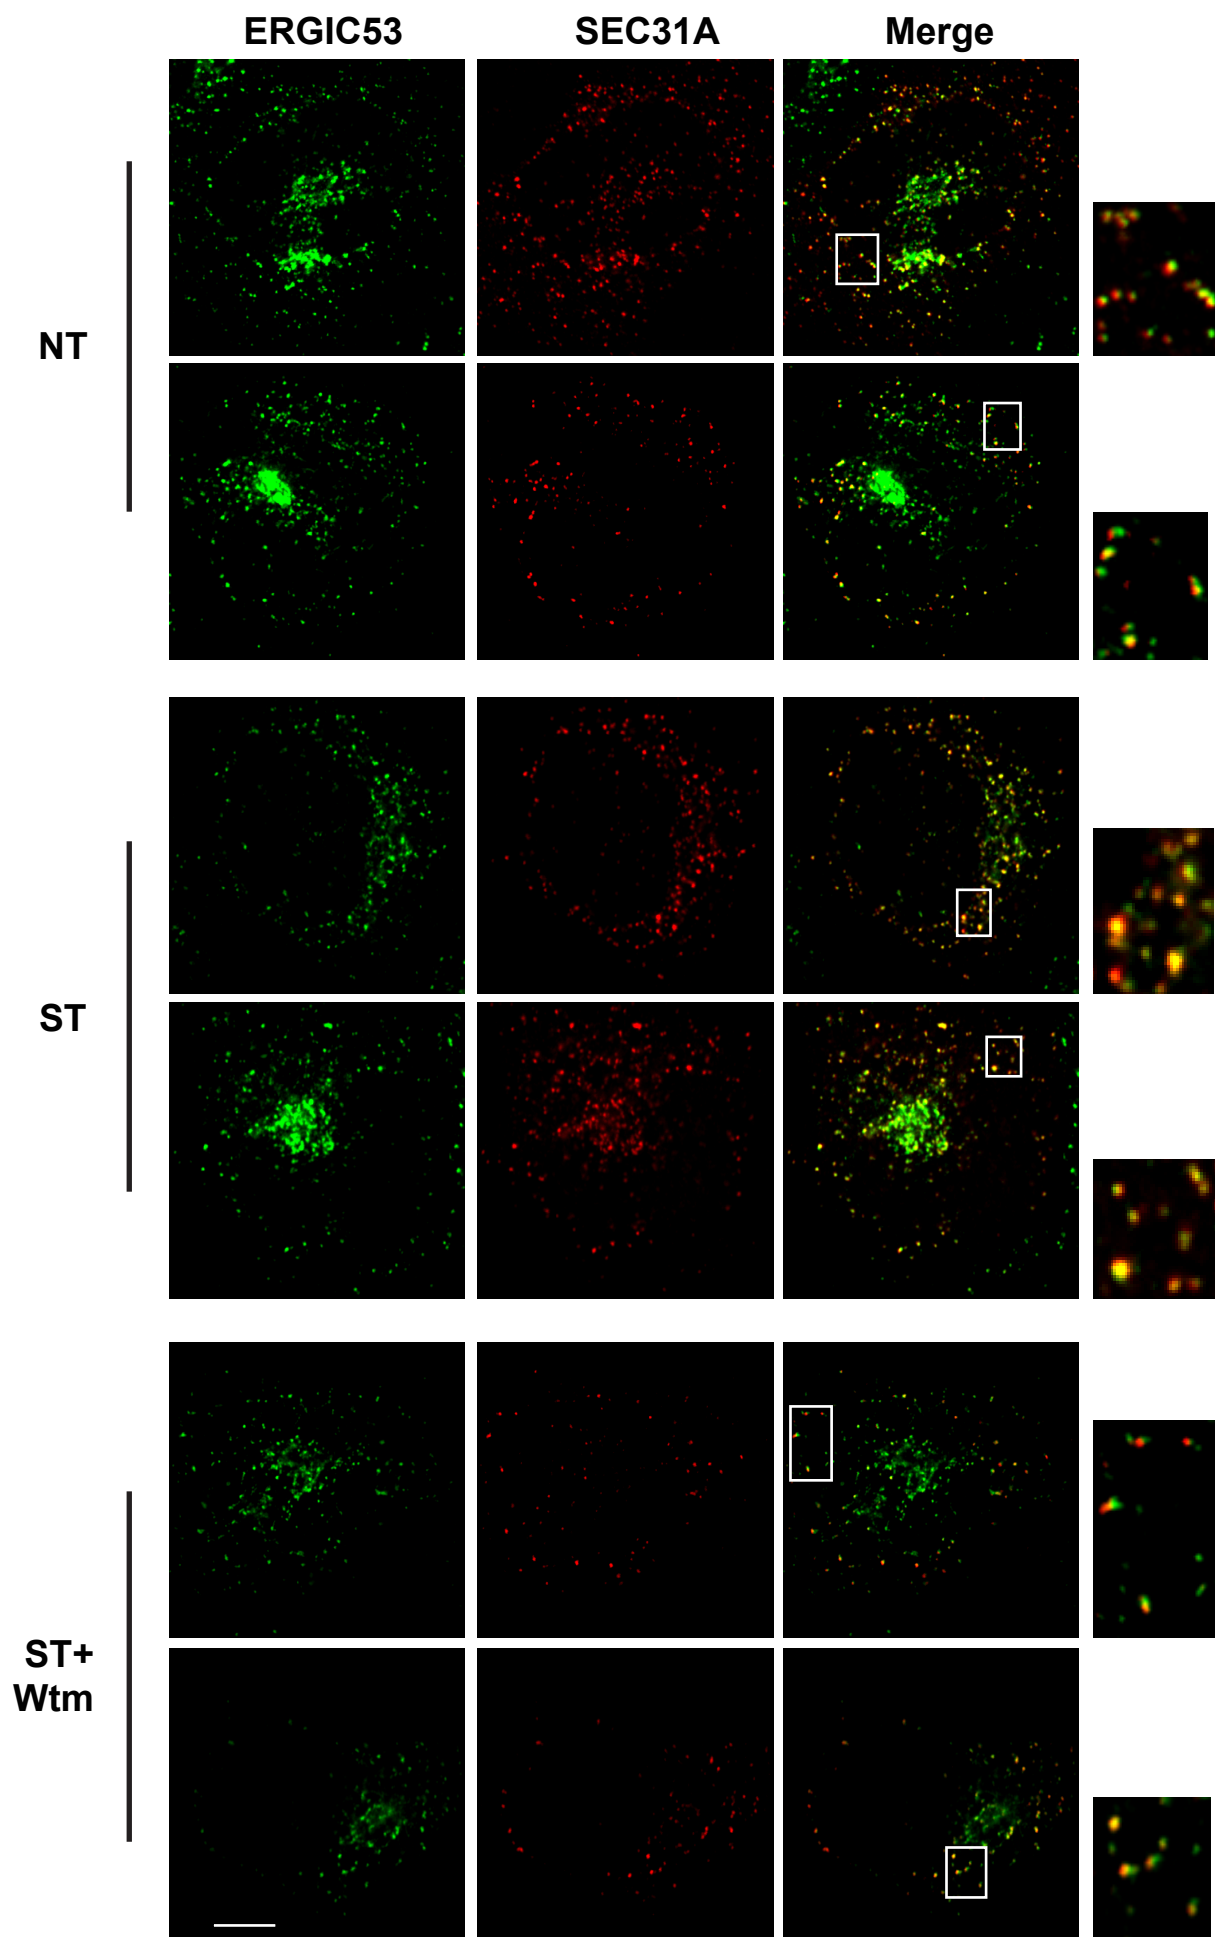

Figure 3-Figure supplement 1

Supplement: supp [file elife-04135-supp-v1.zip]

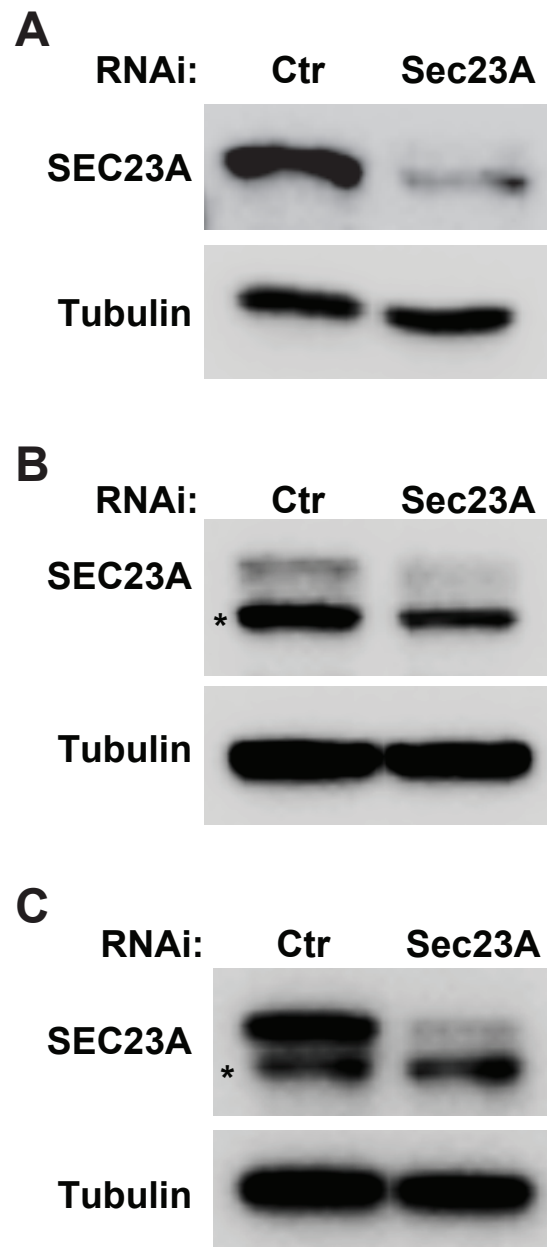

Figure 2-Figure supplement 5

Supplement: supp [file elife-04135-supp-v1.zip]

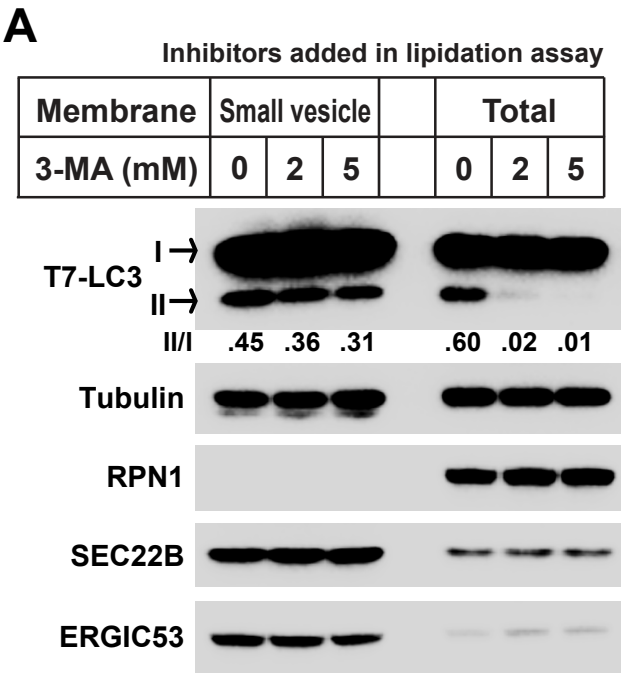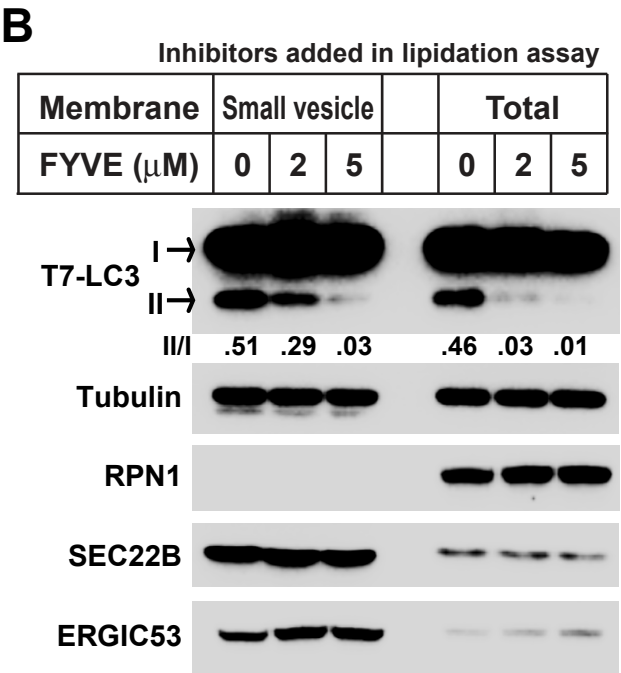

Figure 2-Figure supplement 2

Supplement: supp [file elife-04135-supp-v1.zip]

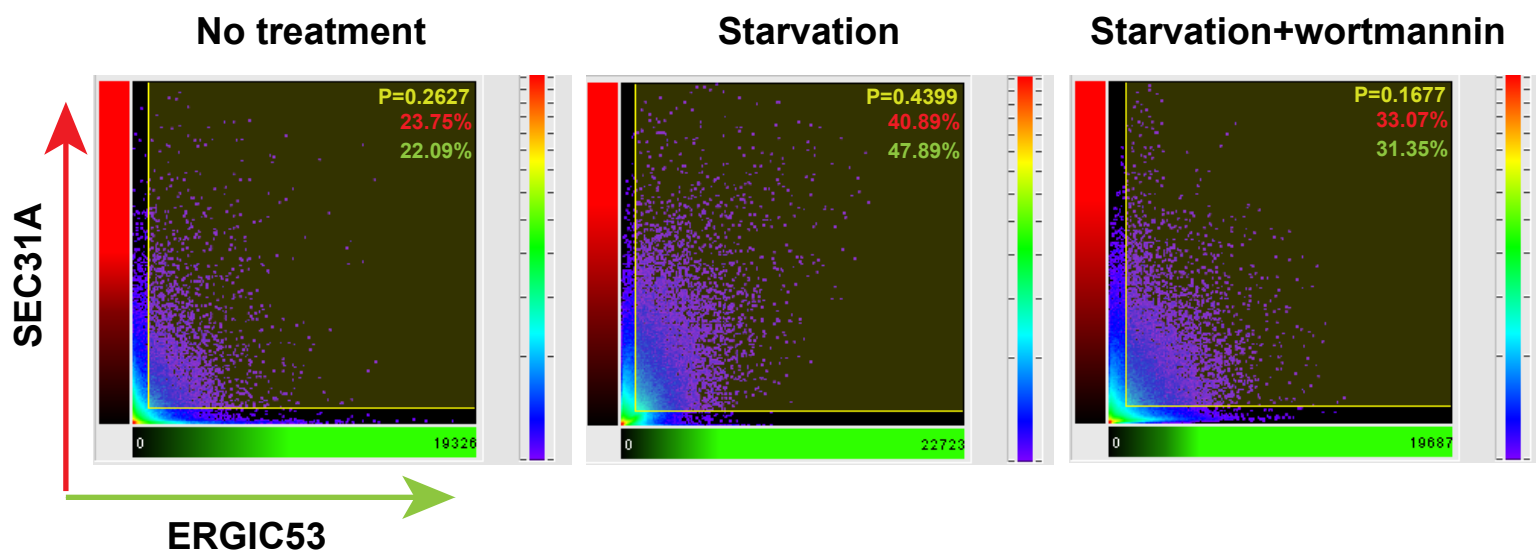

Figure 3-Figure supplement 2

Supplement: supp [file elife-04135-supp-v1.zip]
